Title: Social experience alters different types of learning abilities controlled by distinct brain nuclei in *Kryptolebias marmoratus*

Short title: Social experience and learning ability.

Authors: Cheng-Yu Li<sup>a,b,\*</sup>, Dietmar Kultz<sup>c</sup>, Audrey K. Ward<sup>b,d</sup> & Ryan L. Earley<sup>b</sup>

<sup>a</sup>Department of Biology, University of Maryland, College Park, MD 20742, USA

<sup>b</sup>Department of Biological Sciences, University of Alabama, Tuscaloosa, AL 35487, USA

<sup>c</sup>Department of Animal Sciences, University of California, Davis, CA, 95616, USA

<sup>d</sup>Department of Genetics, University of Georgia, Athens, GA, 30602, USA

\*Corresponding author: Cheng-Yu Li

Department of Biology, University of Maryland

1210 Biology-Psychology Building, College Park, MD 20742, USA

phone: 205-344-2864

Email: [cli12315@umd.edu](mailto:cli12315@umd.edu)

**Author Contributions:** C.Y.L and R.L.E. conceived of and designed the study, analyzed data, and drafted the manuscript; D.K. collected proteomics data and participated in the study design and helped draft the manuscript; C.Y.L. collected behavioral data and collected samples for proteomics analysis; A.K.W. collected, analyzed behavioral data and helped draft the manuscript.

**Competing Interest Statement:** We have no competing interests.

**Classification:** Biological Sciences, Ecology

**Keywords:** winner-loser effects, aggression, spatial learning, risk-avoidance learning, proteomics

**This PDF file includes:**

Main Text

Figures 1 to 6

## 1 **Abstract**

2 Fighting experiences strongly influence aggressive behavior and physiology (winner-loser  
3 effects). These effects are conserved from invertebrates to vertebrates, but the underlying  
4 mechanisms remain unclear. Recent studies indicate that the brain social decision-making  
5 network (SDN) plays a key role in guiding experience-induced behavioral change. Also, while  
6 most studies have focused on how winning and losing experiences alter aggression, growing  
7 evidence points to these experiences driving multiple behavioral effects, including changes in the  
8 ability to learn. In mangrove rivulus fish (*Kryptolebias marmoratus*), we discovered that single  
9 winning experiences significantly improved spatial learning but not risk-avoidance learning,  
10 whereas single losing experiences drove the exact opposite to occur. These results provide strong  
11 evidence that winning and losing modulate diverse behaviors served by key nodes within the  
12 SDN, specifically the dorsolateral pallium (Dl; fish homolog to mammalian hippocampus, which  
13 serves spatial learning) and dorsomedial pallium (Dm; fish homolog to mammalian basolateral  
14 amygdala, which responds to fear). We therefore quantified whole-proteome expression within  
15 the forebrain (where Dm and Dl are located) of adult rivulus with divergent social experiences.  
16 We discovered 23 proteins were significantly differentially expressed in the forebrains of winners  
17 and losers. Differentially expressed proteins in losers related to modulation of cellular processes,  
18 apoptosis and learning while those in winners related to neuronal plasticity, neuroendocrine

19 homeostasis, energy utilization, and learning. These results imply that winner-loser effects might  
20 be governed by very different patterns of protein expression, which could explain why winners  
21 and losers show such pronounced differences in behavioral performance.

22

### 23 **Significance Statement**

24 Social interactions permeate the daily lives of most animals and often result in changes in  
25 behavior for all parties. This implies that social experiences reorganize the brain in ways that  
26 promote the expression of alternative behaviors, or that help individuals cope with the outcome  
27 of such interactions. But how do aggressive interactions sculpt the brain at the molecular level?  
28 We used an emerging model organism, *Kryptolebias marmoratus*, to examine whether  
29 experiences modulate learning ability and then probe the potential neural mechanisms underlying  
30 these behavioral changes. We discovered that single winning and losing experiences dramatically  
31 altered spatial learning and risk-avoidance learning, respectively, indicating that winning and  
32 losing experiences have markedly different effects on the brain and cognitive processes.

### 33 **Introduction**

34 Engaging in aggressive interactions can potently alter physiology and future behavior.  
35 Social victory significantly increases aggression (1) and levels of androgenic hormones, like  
36 testosterone, in most taxonomic groups, including humans (2-5). On the other hand, social defeat  
37 dramatically decreases aggression (1) and can have chronic detrimental effects via prolonged  
38 activation of stress-related pathways in brain (6), which can induce depression and a variety of  
39 other behavioral disorders (7, 8). These responses to prior fighting experiences are termed the  
40 ‘winner effect’ and ‘loser effect’, respectively. Although winner-loser effects are strongly  
41 conserved from insects to humans, their underlying neurophysiological mechanisms remain  
42 largely unknown. Previous studies, which focus mainly on circulating hormones, indicate that  
43 testosterone and its receptor mediate aggression and winner effects (2, 4, 9-12), but recent studies  
44 suggest that other types of neural mechanism, such as activation of dopaminergic system (13, 14)  
45 within social decision-making network (SDN), might also govern behavioral responses to  
46 winning (15-17).

47 In addition, while most studies on contest behavior have focused on how winning and  
48 losing alter aggression, growing evidence points to these types of experience having manifold  
49 behavioral effects, including changes in cognitive ability (18-20). This suggests that social  
50 experiences might elicit widespread alterations to brain function. We thus took the approach of

51 probing the activity of specific brain nuclei by examining the performance of animals on  
52 behavioral tasks known to be associated with activation of these brain regions. For instance,  
53 spatial learning ability has been associated with prior winning experience (19), which led to the  
54 investigating of hippocampus region, whereas the risk-avoidance learning ability has been  
55 associated with prior losing experience (18, 20), which led to scrutinizing basolateral amygdala.  
56 A recent study in fruit flies, *Drosophila melanogaster*, showed that social defeats induce a long-  
57 lasting loser effect associated with *de novo* protein synthesis (21), which is required for the  
58 formation and persistence of long-term memory, whereas social victories had no such long-term  
59 behavioral consequences and were not associated with *de novo* protein synthesis (21). These  
60 studies suggest that distinct neurobiological mechanisms might govern loser and winner effects  
61 across taxa. However, we know little about the memory-related neurophysiological mechanisms  
62 underlying behavioral responses to social competition (4, 22, 23) or the memory mechanisms  
63 that drive persistent changes in behavior following aggressive interactions (24, 25, 26).  
64 Therefore, our first aim was to explore temporal changes in aggression, spatial learning, and risk-  
65 avoidance learning in an emerging model organism, mangrove rivulus fish (*Kryptolebias*  
66 *marmoratus*, hereafter 'rivulus'), following winning and losing experiences. We hypothesized  
67 that winners would show increased aggression and proficiency in spatial learning, because  
68 selection should favor behavioral processes that facilitate acquisition and defense of a territory

69 and resources, which may require superior learning capacities in this context. We also  
70 hypothesized that losers would show decreased aggression but increased proficiency in risk-  
71 avoidance learning because selection should prioritize behaviors that facilitate recovery from  
72 aggressive contests, which may require avoiding risk and being less active overall.

73 Traditional social defeat paradigms (7), which expose animals to repeated losing  
74 experiences, are useful for identifying the terminal influences of multiple aggressive interactions  
75 on behavior and physiology. However, because the brain is exceptionally plastic, it is possible  
76 that the neural mechanisms responsible for short-term changes in behavior are different from  
77 those that maintain behavioral states over the long-term. While much attention has been given to  
78 exploring variation in neurobiology and behavior between animals occupying stable social  
79 rankings, there is increased awareness that examining responses to a single win or loss can  
80 provide insights into how the brain is initially reorganized by social inputs, and how and whether  
81 revamped neural (and associated behavioral) states are maintained over the long-term (27, 28).  
82 Because fighting experiences likely influence social behavior through a complex array of  
83 neuroendocrine interactions, investigating single candidate molecules is not sufficient to  
84 understand the mechanisms driving behavioral change. For this reason, and because proteins are  
85 ultimately responsible for producing the behavioral phenotype (29, 30), the second aim of this  
86 study was to quantify protein abundance in rivulus' forebrain, which includes several brain

87 nuclei (e.g., Dl - fish homolog of mammalian hippocampus; Dm - fish homolog of mammalian  
88 basolateral amygdala) implicated in modulating both aggression and learning, as well as  
89 physiological responses to acute social experiences. We hypothesized that winning and losing  
90 experiences would result in divergent, perhaps unique, patterns of forebrain proteome  
91 expression.

92

## 93 **Results**

94 To investigate whether, and for how long, social experiences affect aggression and learning,  
95 we conducted a full factorial experiment with 3 experience and 3 decay-time levels. Fish ( $n =$   
96 675) were allocated to three experience treatments (W: winner; L: loser; N: no fighting  
97 experience [control]) and individuals in each experience treatment were subdivided into those  
98 exposed to the aggression, spatial learning or risk-avoidance learning tests (**Fig. 1A-C, SI**  
99 **Appendix, Movie S1-S5**). Animals were subjected to behavioral tests before (on Day 1; pre-  
100 experience behaviors) and 1h, 3h or 48h after social experience (on Day 15-17, based on pre-  
101 assigned decay-times; post-experience behaviors). Forebrain proteome expression was quantified  
102 in 12 additional individuals 1h after winning ( $n = 4$ ), losing ( $n = 4$ ) or control ( $n = 4$ )  
103 experiences, the time point at which fish showed pronounced changes in aggression and learning.  
104

105 ***Social experience and aggression***

106 Before social experiences were obtained, individuals assigned to the 3 different experience  
107 treatments showed similar levels of aggression (**Fig. 2A, 2E, SI Appendix, Table S1**). However,  
108 different social experiences caused significant behavioral divergence (**SI Appendix, Table S1**).  
109 Winners delivered more attacks to their mirror image than controls ( $P < 0.001$ , **Fig. 2F**), and  
110 losers were slower to launch first attacks ( $P < 0.001$ , **Fig. 2B**) and delivered fewer attacks to the  
111 mirror image ( $P < 0.001$ , **Fig. 2F**) than both winners and controls.

112 Relative to their pre-experience behavior, winners, losers and controls attacked the mirror  
113 image with higher, lower, and similar frequencies, respectively; all comparisons were  
114 significantly different ( $P < 0.001$ , **Fig. 2G**). Losers also took significantly longer to launch the  
115 first attack relative to their pre-experience behavior, a change that was significantly greater than  
116 that observed for winners or controls ( $P < 0.001$ , **Fig. 2C**). While these patterns remained similar  
117 across decay time points (**Fig. 2D, Fig. 2H**), there was a significant experience x decay-time  
118 interaction for latency to first attack (**Table S1**). Winners' latency to first attack gradually  
119 increased, whereas losers' latency to first attack gradually decreased between 1h and 48h,  
120 suggesting that winner-loser effects were most pronounced at 1h, but slowly decayed after 3h.  
121 Also, there were significant differences among lineages in pre-experience aggression, post-



122 experience aggression, and changes in aggressive behavior (*SI Appendix, Fig. S1A, S1B, Table*  
123 *S1*).

124

### 125 *Social experience and spatial learning*

126 Individuals assigned to each treatment exhibited similar spatial learning performance before  
127 social experiences were obtained (**Fig. 3A, 3D, SI Appendix, Table S2**). Winners were more  
128 likely to pass the spatial learning test than controls at each post-experience time point but not  
129 significantly so at 3h (overall:  $\chi^2 = 11.14$ ,  $P = 0.002$ ; 1h:  $\chi^2 = 4.76$ ,  $P = 0.029$ ; 3h:  $\chi^2 = 1.64$ ,  $P =$   
130  $0.205$ ; 48h:  $\chi^2 = 6.08$ ,  $P = 0.014$ , **Fig. 3B, 3C**). Winners also completed the learning task more  
131 quickly than losers at each post-experience time point, although they did not perform  
132 significantly better at 3 h (losers vs. winners - overall:  $P < 0.001$ ; 1h:  $P = 0.001$ ; 3h:  $P = 0.251$ ;  
133 48h:  $P = 0.039$ , **Fig. 3E, 3F, SI Appendix, Table S2**). Most importantly, winners improved upon  
134 their pre-experience performance whereas losers showed virtually no change at all; the difference  
135 between winners and losers was significant at all time points except 3 h (losers vs. winners -  
136 overall:  $P = 0.001$ ; 1h:  $P = 0.012$ ; 3h:  $P = 0.237$ ; 48h:  $P = 0.009$ , **Fig. 3G, 3H, SI Appendix,**  
137 **Table S2**). There was no significant experience x decay-time interaction on spatial learning,  
138 suggesting that performance differences between winners, losers and controls were preserved  
139 across time. Lastly, there were significant differences among lineages in pre-experience and post-

140 experience spatial learning performance but not the change in spatial learning performance (*SI*  
141 *Appendix, Fig. S1C, S1D; Table S2*).

### 142 *Social experience and risk-avoidance learning*

143 Prior to obtaining social experiences, individuals in the different treatments showed similar  
144 performance in the risk-avoidance learning task (**Fig. 4A, 4D, *SI Appendix, Table S3***). Losers  
145 had a higher probability of passing the risk-avoidance learning test than controls at each post-  
146 experience time point but not significantly so at 3 h (overall:  $\chi^2 = 13.88$ ,  $P < 0.001$ ; 1h:  $\chi^2 = 9.14$ ,  
147  $P = 0.003$ ; 3h:  $\chi^2 = 2.13$ ,  $P = 0.145$ ; 48h:  $\chi^2 = 9.14$ ,  $P = 0.003$ , **Fig. 4B, 4C**). Losers also solved  
148 the learning task faster than winners at all post-experience time points, but the effect was less  
149 pronounced at 48 h (losers vs. winners - overall:  $P < 0.001$ ; 1h:  $P = 0.001$ ; 3h:  $P = 0.025$ ; 48h:  $P$   
150  $= 0.174$ , **Fig. 4E, 4F, *SI Appendix, Table S3***). Losers improved upon their pre-experience risk  
151 learning performance to a greater extent than both winners and controls at each post-experience  
152 time point, although the comparison between winners and losers at 48 h was not significant  
153 (losers vs. winners - overall:  $P < 0.001$ ; 1h:  $P = 0.001$ ; 3h:  $P = 0.037$ ; 48h:  $P = 0.121$ ; losers vs.  
154 controls - overall:  $P = 0.002$ ; 1h:  $P = 0.018$ ; 3h:  $P = 0.037$ ; 48h:  $P = 0.061$ ; **Fig. 4G, 4H, *SI***  
155 ***Appendix, Table S3***). There was no significant experience x decay-time interaction on risk-  
156 avoidance learning, suggesting that differences in learning between winners, losers, and controls  
157 persisted across post-experience time points. There were significant differences among lineages

158 in pre-experience and post-experience risk avoidance learning performance but not the change in  
159 learning performance (*SI Appendix, Fig. S1E, S1F, Table S3*).

160

### 161 *Comparing the effects of social experience on learning abilities*

162 To further investigate how success in the learning tests varied between individuals with  
163 different social experiences, we pooled data across decay-time points within the same experience  
164 type. We then re-categorized individuals based on learning performance (pass or fail) before and  
165 after social experiences (e.g., pass-pass, pass-fail, fail-pass, fail-fail; **Fig. 5**). In the spatial  
166 learning test, the pattern of behavioral change in losers was similar to controls (for losers, 26.7%  
167 improved [fail to pass] and 24% regressed [pass to fail]; for controls, 26.7% improved and 18.7%  
168 regressed). However, winners showed a significantly different pattern than controls (41.3%  
169 improved but only 1.3% regressed). Thus, winning dramatically improved spatial learning  
170 ability, whereas losing had relatively little effect (**Fig. 5A**).

171 For risk-avoidance learning, the pattern of behavioral change in winners was similar to  
172 controls (for winners, 5.3% improved and 18.7% regressed; for controls: 13.3% improved and  
173 14.7% regressed). However, 13.3% of losers improved but 0% regressed, which was  
174 significantly different from controls. Losing therefore had a strong effect on risk-avoidance  
175 learning ability, whereas winning had relatively little effect (**Fig. 5B**).

176

177 ***Proteomic responses to social experiences***

178 Quantitative proteomics analysis of the forebrain identified 1545 proteins, 23 of which  
179 changed significantly in abundance after social experiences were obtained. Of these differentially  
180 expressed proteins, four have functions directly related to learning and memory: i) LRRN4 C-  
181 terminal-like protein, which is involved in synapse formation, increased 3.9-fold ( $P < 0.001$ ) in  
182 losers compared to controls (**Fig. 6**); ii) Ca<sup>2+</sup>/calmodulin-dependent protein kinase type II  
183 subunit  $\alpha$ , which is involved in long-term potentiation (LTP) and synaptic plasticity, increased  
184 3.5-fold ( $P < 0.001$ ) in winners compared to controls (**Fig. 6**); iii) neuromodulin-like protein,  
185 which also participates in LTP, increased 2.5-fold ( $P < 0.001$ ) in losers compared to winners  
186 (**Fig. 6**); iv)  $\gamma$ -adducin-like protein, which is involved in LTP and neural firing, increased 2.5-  
187 fold ( $P < 0.001$ ) in winners compared to losers (**Fig. 6**). Winners were also found to have a 6-  
188 fold higher relative abundance of creatine kinase B-type (CKB) protein, which participates  
189 mainly in energy transduction, than controls and losers. In addition to learning and memory, nine  
190 differentially expressed proteins were related to cellular processes; five to neural plasticity; two  
191 to cell death and apoptosis; two to energy utilization and one to immune function (**Fig. 6**).

192 Overall, losing affected forebrain expression of proteins that modulate cellular processes  
193 (calcium signaling/binding, second messenger production, neurotransmitter release and

194 mobilization of synaptic vesicles), decrease neural plasticity, increase apoptosis and cell death,  
195 facilitate recovery from energy deficit (e.g., gluconeogenesis), and mediate learning and memory  
196 (e.g., LTP and synapse formation). Winning, however, affected forebrain expression of proteins  
197 that mediate cellular processes related to restoration of neuroendocrine homeostasis and signal  
198 transduction, increased neuronal plasticity, energy utilization, and learning mechanisms.

199

## 200 **Discussion**

201 We showed that single winning or losing experiences drive markedly different behavioral  
202 phenotypes. Predictably, winners increased and losers decreased their aggressive behavior,  
203 effects that lasted for at least 48 h. However, we also demonstrated that winning and losing have  
204 discernably different effects on learning. Unlike experience-induced changes in aggression,  
205 where winners and losers showed opposite responses of similar magnitude, the effects of  
206 winning and losing on spatial learning and risk avoidance learning were not symmetrical.  
207 Winning increased performance in a spatial learning task but had essentially no effects on  
208 performance in a risk-avoidance learning task. On the other hand, losing increased risk-  
209 avoidance learning but had no effect on spatial learning. Social experiences also induced  
210 pronounced forebrain proteomic responses and, while some proteins were differentially regulated  
211 in both winners and losers, many of the proteins were differentially expressed in response to only

212 one type of experience. These data provide evidence that neurobiological responses to winning  
213 and losing are not simply 'opposite sides of the same coin' but rather, are quite unique. This  
214 might thus explain the different (but not necessarily opposite) behavioral phenotypes of winners  
215 and losers, especially with respect to learning, and highlights the fact that probing behavioral  
216 endpoints other than aggression can illuminate key distinctions in how the brain processes  
217 divergent social experiences.

218 Winner and loser effects were originally defined by changes in aggression after agonistic  
219 interactions, and thus most previous research focused on the roles of androgenic hormones and  
220 associated receptors in mediating these effects. However, recent studies in invertebrates have  
221 revealed that learning and memory may also change in predictable ways with winning and losing  
222 experience (21, 31, 32). For instance, fruit flies (*Drosophila melanogaster*) can recognize  
223 conspecifics, and losers behave differently when encountering familiar versus unfamiliar  
224 opponents, suggesting that learning and memory accompany changes in social status (31).  
225 Another study further revealed that repeated losing experiences induced a long-lasting loser  
226 effect, which can be blocked by inhibiting protein synthesis, suggesting that the formation of a  
227 long-term loser effect requires *de novo* protein synthesis (23). Interestingly, however, repeated  
228 winning experience had no such behavioral or physiological consequences in the fruit flies (23).  
229 These results imply that different neurobiological mechanisms might govern the expression of

230 winner and loser effects. In crayfish, *Procambarus clarkii*, winner effects can last more than 14  
231 days, and the loser effect can last about 10 days (32). Dominant individuals injected with a 5-  
232 HT1 receptor antagonist failed to show the winner effect, whereas subordinate individuals  
233 injected with adrenergic-like octopamine receptor antagonist failed to show a loser effect (32).  
234 These results provided additional evidence for winner and loser effects being modulated by  
235 different neurobiological mechanisms. Furthermore, monoamines, such as serotonin and  
236 octopamine, are involved in the expression of various behaviors, ranging from aggression to  
237 learning and memory in a diverse array of species, suggesting that winner-loser effects could be  
238 mediated by changes in neural processes related to cognition.

239       Though previous studies have revealed that fighting experience can affect learning and  
240 memory (e.g., 19, 20), few studies investigate whether winning and losing experiences influence  
241 different types of learning, or the persistence of experience-induced gains and losses in learning  
242 ability. Our data revealed that winning and losing not only altered aggression, but also affected  
243 spatial and risk-avoidance learning abilities. Temporal patterns of change in aggression and  
244 learning also were quite similar, with the effects being most pronounced 1h after fights and  
245 gradually decreasing at 3h and 48h. We further discovered that winning and losing independently  
246 modulated specific types of learning – spatial learning and risk-avoidance learning, respectively.  
247 Spatial learning and memory are mediated primarily by the hippocampus, which provides

248 animals with spatial information of environment and plays important roles in the consolidation of  
249 information from short-term memory to long-term memory (33). Risk-avoidance learning is a  
250 type of fear conditioning regulated (along with emotional learning) in large part by the amygdala.  
251 Both the hippocampus and amygdala also mediate aggressive behavior (34, 35). Most studies  
252 hypothesize that winner and loser effects are governed by the same molecule or mechanism, such  
253 as testosterone. However, this hypothesis is rarely supported. For instance, Oliveira et al. (4)  
254 hypothesized that socially-induced changes in androgen levels should be a causal mediator of  
255 both winner and loser effects. They discovered that anti-androgen treatment blocked the winner  
256 effect but injecting with androgens failed to rescue the loser effect, suggesting that androgens are  
257 involved only in the winner effect. Trannoy et al. (23) showed that winner and loser effects decay  
258 over different time courses in fruit flies, which led to the idea that different memory mechanisms  
259 might underlie their expression. Our data support this idea and further imply that winning  
260 experiences might alter protein expression in the hippocampus and enhance spatial learning,  
261 whereas losing experiences might alter protein expression in the amygdala and strengthen risk-  
262 avoidance learning. That is, winner and loser effects may not only be governed by different  
263 neurobiological mechanisms but might also be mediated by different brain nuclei. Together with  
264 previous research, our results suggest that winner-loser effects emerge as a consequence of  
265 multiple, perhaps independent neurobiological systems regulating behavioral expression.



266 Because these independent systems can be tuned by the type and intensity of social experience,  
267 this is likely to profoundly increase behavioral variation among individuals as experiences  
268 accumulate, which can then provide fodder for natural selection. If responses to winning and  
269 losing experiences are heritable, as indicated by significant variation among rivulus lineages in  
270 experience-induced changes to aggression, this could facilitate the evolution of adaptive neural  
271 and behavioral flexibility.

272 Our proteomics data revealed several promising candidate forebrain proteins associated  
273 with social behavior, learning and memory. Identification of brain proteins associated with these  
274 behaviors propels dissection of the molecular mechanisms underlying winner and loser effects.  
275 For example, creatine kinase B-type (CKB) protein, which is expressed in the hippocampus,  
276 cerebellum, and choroid plexus (36), was highly upregulated in winners, but not in losers. CKB  
277 mainly participates in energy transduction in the central nervous system but, studies in  
278 homozygous knockout mice suggests a critical role for CKB in spatial learning; deficient  
279 individuals took longer than wild type individuals to complete the Morris water maze (37). In our  
280 study, it is thus possible that winning experiences increase expression CKB in the hippocampus,  
281 thereby improving spatial learning abilities. Whether increasing expression of CKB would also  
282 alter aggression needs further investigation. Another protein, synapsin-2, which plays a major  
283 role in generating synapses and in regulating neurotransmitter release, was significantly

284 upregulated in the forebrains of losers relative to winners. In mice, synapsin-2 is constitutively  
285 upregulated in the hippocampus of losers, and its expression is strongly linked with submissive  
286 behavior, which is almost uniformly exhibited by animals that experience social defeat (38).  
287 Therefore, our results support the idea that losing experiences could upregulate expression of  
288 synapsin-2 in the forebrain but, whether expression of synapsin-2 is causally associated with  
289 changes in aggression and risk-avoidance learning are unclear.

290       It is important to note that we only quantified protein abundance 1h after social experience  
291 because we observed the most prominent behavioral changes at this time point. Thus, one  
292 possible explanation is that *de novo* protein synthesis can cause the observed changes in protein  
293 abundance in such short period of time. Alternatively, it is much more likely that specific  
294 proteins are rapidly degraded in response to certain signals (39). Studies in rodents revealed that  
295 memory consolidation (short-term memory traces being converted to long-term memory)  
296 requires not only protein synthesis but also protein degradation (40). In other words, rapid  
297 changes in protein abundance could be because certain proteins exist in an unstable state that  
298 renders them rapidly degradable in response to a particular stimulus, such as winning or losing  
299 experiences.

300       In summary, we have demonstrated that divergent social experiences alter different learning  
301 processes that are mediated by distinct brain nuclei, suggesting that winner effects and loser

302 effects are governed by very different neurobiological mechanisms. We also identified a group of  
303 candidate forebrain proteins that might modulate experience-induced changes in behavior.  
304 Further experiments that manipulate expression of these candidate proteins in specific brain  
305 nuclei (e.g., hippocampus, amygdala and their homologs in other vertebrates) will advance our  
306 knowledge about the neural mechanisms underlying experience-induced changes in aggressive  
307 behavior and cognitive abilities.

308

## 309 **Materials and Methods**

### 310 *Study organism*

311 This study used adult hermaphroditic mangrove rivulus, *Kryptolebias marmoratus*  
312 ('rivulus'), from 25 isogenic lineages whose progenitors were wild caught in Belize, the  
313 Bahamas, Florida Keys and peninsular Florida. The animals used in this study were two  
314 generations removed from field-caught progenitors and were produced via self-fertilization.  
315 Individuals were isolated on the day of hatching and kept individually in 1L translucent plastic  
316 containers filled with 750 mL of 25 ppt synthetic seawater (Instant Ocean®). Each container was  
317 labelled with a unique number for individual identification. Fish were maintained at ambient  
318 temperature ( $27\pm 1^\circ\text{C}$ ) on a 12h light: 12h dark photoperiod and fed 2 mL newly hatched brine  
319 shrimp (*Artemia*) nauplii every day.

320

321 *Providing social experience and quantifying behavior performance*

322 To ensure that individuals received their pre-assigned winning or losing experience, they  
323 were fought against much smaller/larger (difference > 2 mm) standard losers/winners that had  
324 lost/won several fights against conspecific opponents (random selection procedure, [1]).

325 In the aggression test, we quantified individuals' aggressive responses using non-reversing  
326 mirror-image stimulation (41, **Fig. 1A**). The latency to initiate aggressive attacks and frequency  
327 of aggressive attacks toward mirror image were recorded as aggression indices. In the spatial  
328 learning test, individuals were challenged to recall the location of reward (water + brine shrimp  
329 nauplii) in a 37 L tank that contained only a layer of moist sponge (1 cm) at the bottom (**Fig.**  
330 **1B**). This apparatus was modified from Chang et al. (19), and was based on the ecologically  
331 relevant premise that rivulus jump or crawl across moist land to seek out water in mangrove  
332 forests (42). Fish were given two training sessions (30 min for each session) to become familiar  
333 with the environment and to learn the location of the petri dish containing the reward (water +  
334 brine shrimp nauplii). During the testing phase, fish were allowed to explore the tank for 30 min  
335 to locate the correct petri dish from the previous two training sessions. We considered an  
336 individual to have passed or failed the test based on whether it succeeded in locating the correct  
337 petri dish; we also recorded the latency to complete the task as a measure of individual spatial

338 learning ability. The risk-avoidance learning test entailed the focal animal being challenged to  
339 learn the association between a visual cue (red color, conditioned stimulus [CS]) and an event  
340 indicating risk (black corrugated plastic gliding over the tank, unconditioned stimulus [US], **Fig.**  
341 **1C**). We anticipated that fish would respond to the simulated predator stimulus by seeking shelter  
342 and that they would establish an association between red color (CS) and risk signal (US). An  
343 individual passed or failed when it sought shelter within 5 min after seeing the red card appear.  
344 We also recorded the latency to complete the task as a measure of individual risk-avoidance  
345 learning ability. Individuals that failed the spatial learning or risk-avoidance tasks during either  
346 training or during the testing phase were also included in the final data set because a failing  
347 result was used for comparison between the pre- and post-experience learning performance.  
348 Details of each procedure are provided in *SI Appendix, Supplementary Material & Methods*.

#### 349 *Sample preparation and protein quantitation in forebrain*

350 After receiving social experience, rivulus ( $n = 12$ ) were decapitated at 1h in accordance  
351 with IACUC standards for euthanasia. Brains were dissected, and forebrains were then separated  
352 using a razor blade under a dissecting microscope. Tissues were snap-frozen in liquid nitrogen,  
353 stored at  $-80^{\circ}\text{C}$  and sent to the University of California, Davis to quantify proteome expression.  
354 Protein extraction, protein assays and in-solution trypsin digestion were performed following the  
355 protocol established by Kültz and colleagues (43). Detailed procedures regarding sample

356 preparation are provided in ***SI Appendix, Supplementary Material & Methods***. Protein IDs  
357 were mapped to MSMS spectra of particular tryptic peptides using four different search engines,  
358 including PEAKS 8.5, Mascot 2.2.7 (Matrix Science, London, UK; version 2.2.07), X!Tandem  
359 *Alanine* (<http://www.thegpm.org/tandem/>) and Byonic (Protein Metrics, San Carlos, CA, USA;  
360 version 2.12). The complete *Kryptolebias marmoratus* proteome (38,516 proteins), an equal  
361 number of decoy entries and common contaminants (porcine trypsin, human keratin) were used  
362 as the reference database for all searches. Results from all four search engines were consolidated  
363 in Scaffold 4.4 (Proteome Software Inc., Portland, OR, USA) and proteins represented by at least  
364 2 unique peptides and meeting a protein level FDR < 1.0% and a peptide level FDR < 0.1% were  
365 considered valid IDs. Label-free quantitative profiling of peptide intensities and calculation of  
366 relative protein abundances in each sample was performed with PEAKS 8.5. The PEAKS protein  
367 quantitation is based on the Top3 approach, which measures the area under the curve of the three  
368 most abundant unique peptides for a particular protein from the LC-MS/MS chromatogram.  
369 Relative abundance of a peptide in a sample was normalized against the overall abundance of all  
370 peptides in that sample.

371

372 ***Statistical Analysis***

373           General linear models examined whether winners, losers and controls exhibited different  
374 levels of aggression before and after social experience, and also whether individuals with  
375 different experiences showed variation in the degree to which aggression changed from pre- to  
376 post-experience. The response variables were: latency to first attack (ln-transformed to achieve  
377 normality) and number of attacks in the pre-experience aggression test or post-experience  
378 aggression test, as well as changes in latency to first attack and changes in number of attacks (run  
379 in separate models). Type of experience (W, N, L) and decay time (1h, 3h, 48h) were fixed  
380 predictor variables. The interaction term, experience x decay time, was also included in the  
381 models. Lineage and standard length of focal individuals were included in the model as  
382 covariates.

383           General linear models also examined whether social experience influenced spatial learning  
384 and risk-learning abilities. Pre- and post-experience learning behavior, including latency to pass  
385 spatial learning and risk learning tasks, and changes in learning abilities were the response  
386 variables. Type of experience (W, N, L) and decay time (1h, 3h, 48h) were fixed predictor  
387 variables. The interaction term, experience x decay, time was also included in the models.  
388 Lineage and standard length of focal individuals were included in the model as covariates.

389           Tukey's Honest Significant Difference (HSD) *post hoc* multiple comparisons tests  
390 determined differences among levels for the main effects and interactions; results of the Tukey's

391 HSD tests are presented as *P*-values in parentheses following a description of the differences  
392 (**Fig. 2, Fig. 3D-H, Fig. 4D-H**).

393 Chi-square tests determined whether the probability of successfully passing each learning  
394 task differed between winners versus controls and between losers versus controls (**Fig. 3A-C,**  
395 **Fig. 4A-C, Fig. 5**). JMP (v. 12; SAS Institute, Cary, NC, USA) was used for all statistical  
396 analyses involving behavior.

397 Statistical significance for label-free protein quantitation was based on PEAKSQ  $-\log_{10}(P$ -  
398 values), which were calculated using a previously developed algorithm that has been optimized  
399 for proteomics data (44). In this study, a significance threshold of  $-\log_{10}(P\text{-values}) \geq 13$  and fold  
400 change  $\geq 2.0$  were applied. All proteomics data, including raw data, metadata, Scaffold file,  
401 peptide and protein identifications, and quantitative data are accessible in public proteomics  
402 repositories (MassIVE AC: MSV000082806, ProteomeXchange AC: PXD010729). The Scaffold  
403 file and zipped PEAKSQ data are accessible via ftp download from MassIVE (AC:  
404 MSV000082806).

405

## 406 **Acknowledgements**

407 We thank Caitlin Curtis for assisting in scoring behavior videos. We also thank all members of  
408 the Earley laboratory and Kültz laboratory for their comments on the manuscript and their



409 support on this project. This research was supported by Sigma Xi Scientific Research Honors  
410 Society (Grants-in-Aid: G201703158955-1084) and College Academy for Research, Scholarship  
411 and Creative Activity (CARSCA) committee at the University of Alabama.  
412

413 **References**

- 414 1. Y. Hsu, R. L. Earley, L. L. Wolf, Modulation of aggressive behaviour by fighting  
415 experience: mechanisms and contest outcomes. *Biol. Rev.* **81**, 33-74 (2006).
- 416 2. T. O. Oyegbile, C. A. Marler, Winning fights elevates testosterone levels in California mice  
417 and enhances future ability to win fights. *Horm. Behav.* **48**, 259-267 (2005).
- 418 3. M. J. Fuxjager, G. Mast, E. A. Becker, C. A. Marler CA, The 'home advantage' is necessary  
419 for a full winner effect and changes in post-encounter testosterone. *Horm. Behav.* **56**, 214-  
420 219 (2009).
- 421 4. R. F. Oliveira, A. Silva, A. V. M. Canario, Why do winners keep winning? Androgen  
422 mediation of winner but not loser effects in cichlid fish. *Proc. Biol. Sci.* **276**, 2249-2256  
423 (2009).
- 424 5. J. M. Carré, J. A. Campbell, E. Lozoya, S. M. Goetz, K. M. Welker KM, Changes in  
425 testosterone mediate the effect of winning on subsequent aggressive behaviour.  
426 *Psychoneuroendocrinology* **38**, 2034-2041 (2013).
- 427 6. F. Marini et al., Single exposure to social defeat increases corticotropin-releasing factor and  
428 glucocorticoid receptor mRNA expression in rat hippocampus. *Brain Res.* **1067**, 25-35  
429 (2006).
- 430 7. K. L. Huhman, Social conflict models: can they inform us about human psychopathology?

- 431 *Horm. Behav.* **50**, 640-646 (2006).
- 432 8. N. A. Troop, S. Hiskey, Social defeat and PTSD symptoms following trauma. *Br. J. Clin.*  
433 *Psychol.* **52**, 365-379 (2013).
- 434 9. J. M. Carré, P. H. Mehta, Importance of considering testosterone-cortisol interactions in  
435 predicting human aggression and dominance. *Aggress. Behav.* **37**, 489-491 (2011).
- 436 10. M. J. Fuxjager et al., Winning territorial disputes selectively enhances androgen sensitivity  
437 in neural pathways related to motivation and social aggression. *Proc. Natl. Acad. Sci. U.S.A.*  
438 **107**, 12393-12398 (2010).
- 439 11. M. J. Fuxjager, T. O. Oyegbile, C. A. Marler, Independent and additive contributions of  
440 postvictory testosterone and social experience to the development of the winner effect.  
441 *Endocrinology* **152**, 3422-3429 (2011).
- 442 12. C. Y. Li, R. L. Earley, S. P. Huang, Y. Hsu, Fighting experience alters brain androgen  
443 receptor expression dependent on testosterone status. *Proc. Biol. Sci.* **281**, 20141532 (2014).
- 444 13. E. A. Becker, C. A. Marler, Postcontest blockade of dopamine receptors inhibits  
445 development of the winner effect in the California mouse (*Peromyscus californicus*). *Behav.*  
446 *Neurosci.* **129**, 205-213 (2015).
- 447 14. J. J. Schwartz, L. A. Ricci, R. H. Melloni Jr., Prior fighting experience increases  
448 aggression in Syrian hamsters: implications for a role of dopamine in the winner effect.

- 449        *Aggress. Behav.* **39**, 290-300 (2013).
- 450    15. S. M. Goetz et al., Testosterone rapidly increases neural reactivity to threat in healthy men:  
451        a novel two-step pharmacological challenge paradigm. *Biol. Psychiatry* **76**, 324-331 (2014).
- 452    16. J. M. Carré, N. A. Olmstead, Social neuroendocrinology of human aggression: examining  
453        the role of competition-induced testosterone dynamics. *Neuroscience* **286**, 171-186 (2015).
- 454    17. R. M. de Almeida, J. C. Cabral, R. Narvaes, Behavioural, hormonal and neurobiological  
455        mechanisms of aggressive behaviour in human and nonhuman primates. *Physiol. Behav.*  
456        **143**, 121-135 (2015).
- 457    18. L. Kaczer, S. Pedetta, H. Maldonado, Aggressiveness and memory: Subordinate crabs  
458        present higher memory ability than dominants after an agonistic experience. *Neurobiol.*  
459        *Learn. Mem.* **87**, 140-148 (2007).
- 460    19. C. Chang, C. Y. Li, R. L. Earley, Y. Hsu, Aggression and related behavioral traits: the impact  
461        of winning and losing and the role of hormones. *Integr. Comp. Biol.* **52**, 801-813 (2012).
- 462    20. D. Colas-Zelin et al., The imposition of, but not the propensity for, social subordination  
463        impairs exploratory behaviors and general cognitive abilities. *Behav. Brain Res.* **232**, 294-  
464        305 (2012).
- 465    21. S. Trannoy, J. Penn, K. Lucey, D. Popovic, E. A. Kravitz, Short and long-lasting behavioral  
466        consequences of agonistic encounters between male *Drosophila melanogaster*. *Proc. Natl.*

- 467 *Acad. Sci. U.S.A.* **113**, 4818-4823 (2016).
- 468 22. V Kloke et al., The winner and loser effect, serotonin transporter genotype, and the display  
469 of offensive aggression. *Physiol. Behav.* **103**, 565-574 (2011).
- 470 23. K. Hirschenhauser, M. Gahr, W. Goymann, Winning and losing in public: audiences direct  
471 future success in Japanese quail. *Horm. Behav.* **63**, 625-633 (2013).
- 472 24. Y. T. Lan, Y. Hsu, Prior dominance experience exerts a long-term influence on subsequent  
473 winner and loser effects. *Front. Zool.* **8**, 28 (2011).
- 474 25. K. L. Hollis, The role of learning in the aggressive and reproductive behavior of blue  
475 gouramis, *Trichogaster trichopterus*. *Environ. Biol. Fishes* **54**, 355-369 (1999).
- 476 26. R. E. Carpenter, C. H. Summers, Learning strategies during fear conditioning. *Neurobiol.*  
477 *Learn. Mem.* **91**, 415-423 (2009).
- 478 27. K. P. Maruska, A. Zhang, A. Neboori, R. D. Fernald, Social opportunity causes rapid  
479 transcriptional changes in the social behaviour network of the brain in an African  
480 cichlidfish. *J. Neuroendocrinol.* **25**, 145-157 (2013).
- 481 28. T. Hattori, W. Wilczynski, Differences in forebrain androgen receptor expression in winners  
482 and losers of male anole aggressive interactions. *Brain Res.* **1582**, 45-54 (2014).
- 483 29. C. M. Valcu, B. Kempenaers, Proteomics in behavioral ecology. *Behav. Ecol.* **26**, 1-15  
484 (2015).

- 485 30. C. Vogel, E. M. Marcotte, Insights into the regulation of protein abundance from proteomic  
486 and transcriptomic analysis. *Nat. Rev. Genet.* **13**, 227-232 (2012).
- 487 31. A. Yurkovic, O. Wang, A. C. Basu, E. A. Kravitz, Learning and memory associated with  
488 aggression in *Drosophila melanogaster*. *Proc. Natl. Acad. Sci. U.S.A.* **103**, 17519-17524  
489 (2006).
- 490 32. Y. Momohara, H. Minami, A. Kanai, T. Nagayama, Role of cAMP signalling in winner and  
491 loser effects in crayfish agonistic encounters. *Eur. J. Neurosci.* **44**, 1886-1895 (2016).
- 492 33. S. McKenzie, H. Eichenbaum, Consolidation and reconsolidation: two lives of memories?  
493 *Neuron* **71**, 224-233 (2011).
- 494 34. W. J. Korzan, T. R. Summers, C. H. Summers, Monoaminergic activities of limbic regions  
495 are elevated during aggression: influence of sympathetic social signaling. *Brain Res.* **870**,  
496 170-178 (2000).
- 497 35. A. H. Veenema, I. D. Neumann, Neurobiological mechanisms of aggression and stress  
498 coping: a comparative study in mouse and rat selection lines. *Brain Behav. Evol.* **70**, 274-  
499 285 (2007).
- 500 36. P. Kaldis, W. Hemmer, E. Zanolla, D. Holtzman, T Wallimann, 'Hot spots' of creatine kinase  
501 localization in brain: cerebellum, hippocampus and choroid plexus. *Dev. Neurosci.* **18**, 542-  
502 554 (1996).

- 503 37. F. Streijger et al., Mice lacking the UbCKmit isoform of creatine kinase reveal slower  
504 spatial learning acquisition, diminished exploration and habituation, and reduced acoustic  
505 startle reflex responses. *Mol. Cell Biochem.* **256/257**, 305-318 (2004).
- 506 38. E. Neshet et al., Synapsin IIb as a functional marker of submissive behavior. *Sci. Rep.* **5**,  
507 10287 (2015).
- 508 39. F. Yoshizawa, T. Nagasawa, N. Nishizawa, R. Funabiki, Protein synthesis and degradation  
509 change rapidly in response to food intake in muscle of food-deprived mice. *J. Nutr.* **127**,  
510 1156-1159 (1997).
- 511 40. D. Fioravante, J. H. Byrne, Protein degradation and memory formation. *Brain Res. Bull.* **85**,  
512 14-20 (2011).
- 513 41. C. Y. Li, C. Curtis, R. L. Earley, Nonreversing mirrors elicit behaviour that more accurately  
514 predicts performance against live opponents. *Anim. Behav.* **137**, 95-105 (2018).
- 515 42. A. J. Pronko, B. M. Perlman, M. A. Ashley-Ross, Launches, squiggles and pounces, oh my!  
516 The water-land transition in mangrove rivulus (*Kryptolebias marmoratus*). *J. Exp. Biol.*  
517 **216**, 3988-3995 (2013).
- 518 43. D. Kultz, J. Li, A. Gardell, R. Sacchi, Quantitative molecular phenotyping of gill  
519 remodeling in a cichlid fish responding to salinity stress. *Mol. Cell. Proteomics* **12**, 3962-  
520 3975 (2013).

521 44. J. Cox, M. Mann, MaxQuant enables high peptide identification rates, individualized p.p.b.-  
522 range mass accuracies and proteome-wide protein quantification. *Nat. Biotechnol.* **26**, 1367-  
523 1372 (2008).  
524



525 **Figures**

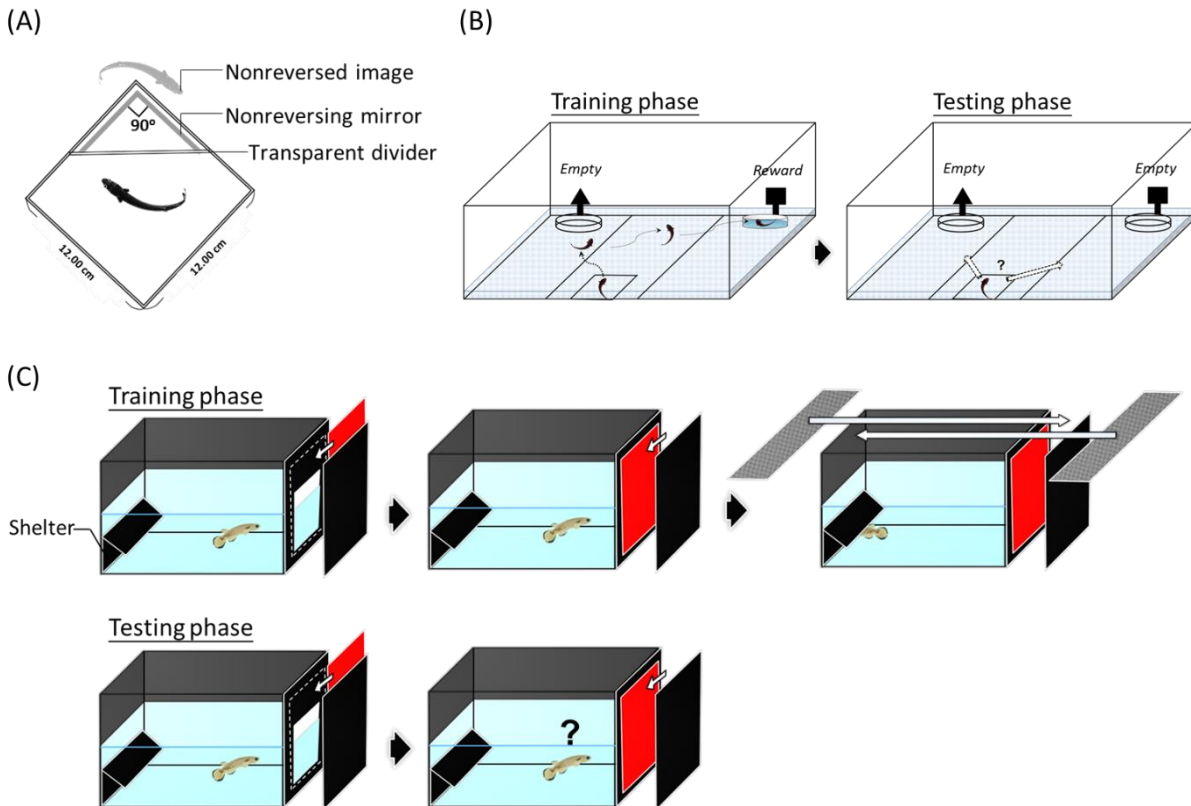

526

527

528 **Figure 1.** Setups for the (A) aggression test (non-reversing mirror image stimulation) (B) spatial  
529 learning test, which challenged fish to navigate an arena to find a reward (water/food) (C) risk-  
530 avoidance learning test, which challenged fish to associate red color with risk.

531

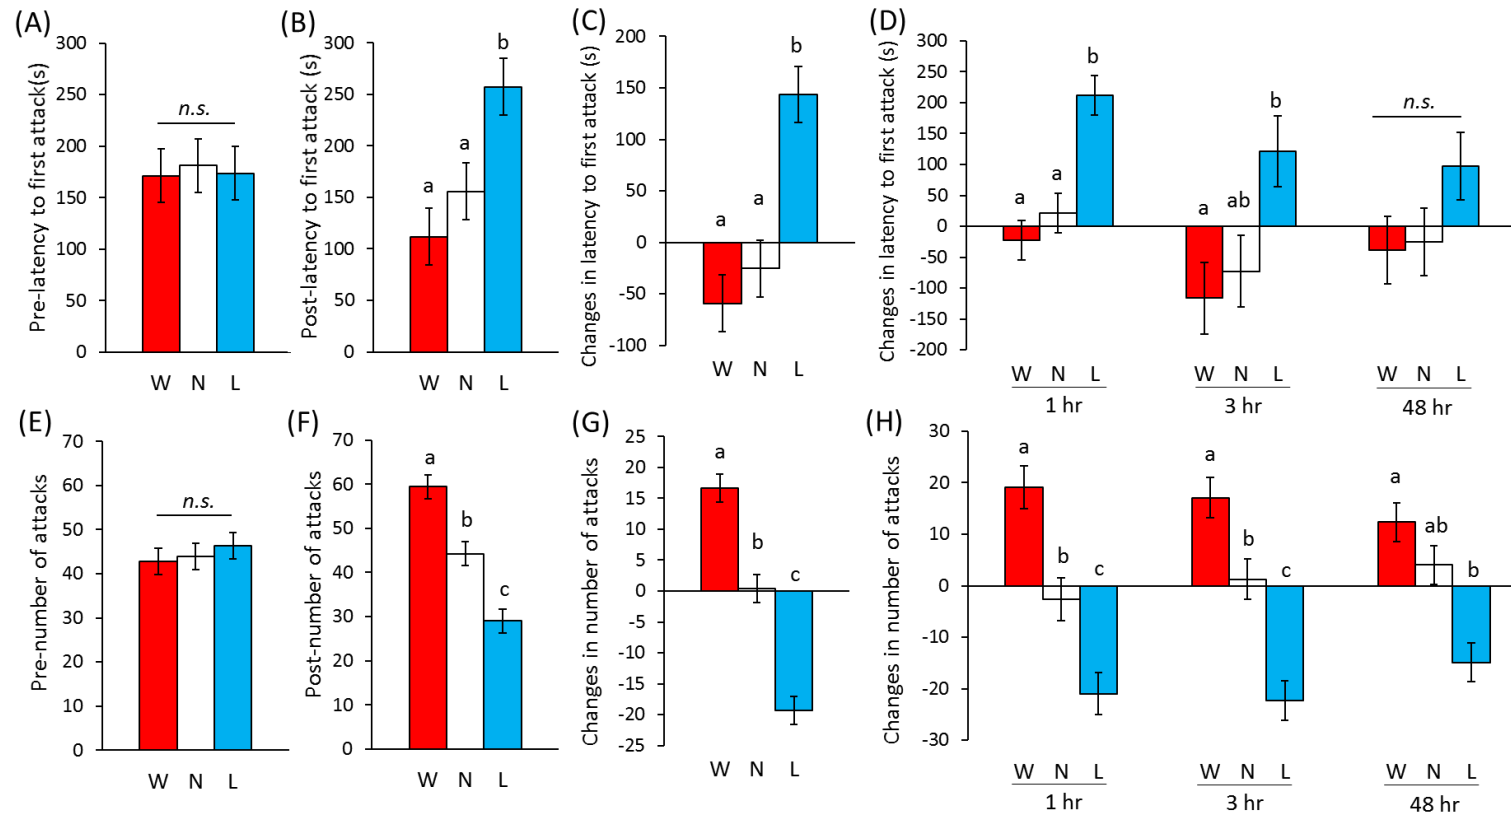

532 **Figure 2.** The influence of social experience on aggression. Differences among treatments in aggressive responses toward the non-reversing  
533 mirror image: **(A)(E)** before social experience, and **(B)(F)** after social experience. Differences among treatments in how the animals responded  
534 to social experience (post-experience behavior minus pre-experience behavior), with respect to **(C)** latency to first attack and **(G)** number of  
535 attacks towards the mirror image. Temporal changes in winner-loser effects for **(D)** latency to first attack and **(H)** number of attacks from 1h, 3h  
536 to 48h post-experience. Note that ‘latency to first attack’ is inversely related to aggression such that negative changes in latency to first attack  
537 indicate increased aggression. Different lowercase letters indicate significant differences between treatments within a given histogram plot  
538 (Tukey’s HSD,  $P < 0.05$ ; *n.s.* non-significant; W-winners, N-control (no) experience, L-losers;  $n = 75$  for each experience).

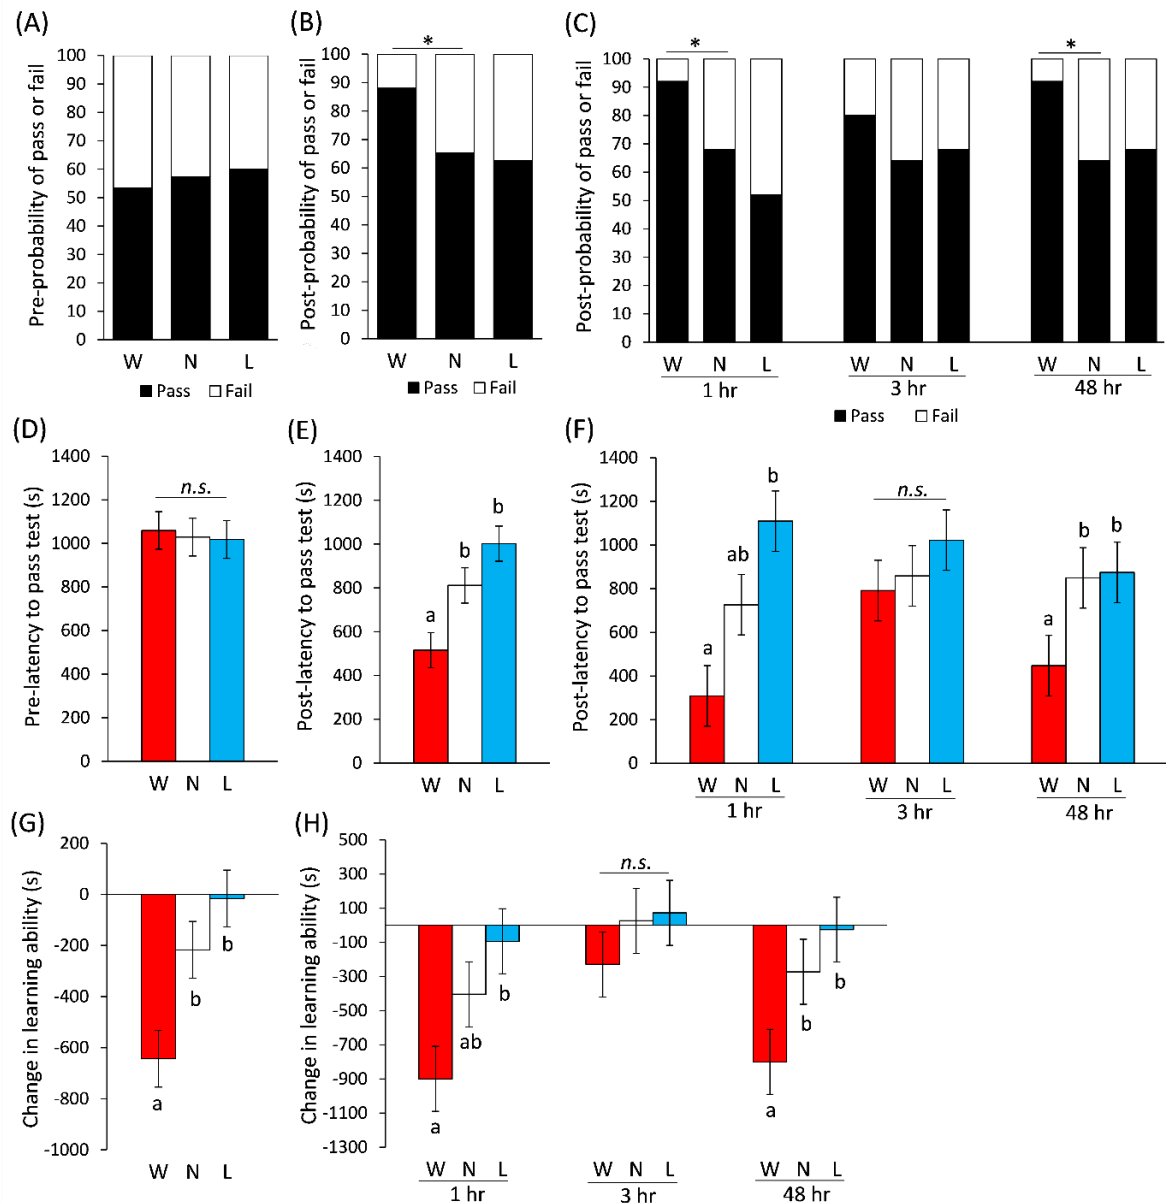

539 **Figure 3.** The influence of social experience on spatial learning. Differences among  
 540 treatments prior to social experience for (A) probability of passing/failing the learning test  
 541 and (D) latency (in seconds, *s*) to complete the learning test. Effects of social experience on  
 542 spatial learning, including (B) probability of passing/failing the test, (E) latency to complete  
 543 the learning test and (G) change in learning ability (post-experience minus pre-experience  
 544 performance). Temporal changes in experience effects on spatial learning behavior from 1h,  
 545 3h to 48h, including (C) probability of passing/failing the test, (F) latency to complete the  
 546 learning test and (H) change in learning ability. Note that ‘latency to pass the learning test’ is  
 547 inversely correlated with learning ability such that negative changes in latency indicate  
 548 increased learning performance. Asterisk indicates significant difference between treatments  
 549 (Chi-square test). Different lowercase letters indicate significant differences between  
 550 treatments within a histogram plot (Tukey’s HSD,  $P < 0.05$ ; *n.s.* non-significant; W-winners,  
 551 N-control (no) experience, L-losers;  $n = 75$  for each experience).

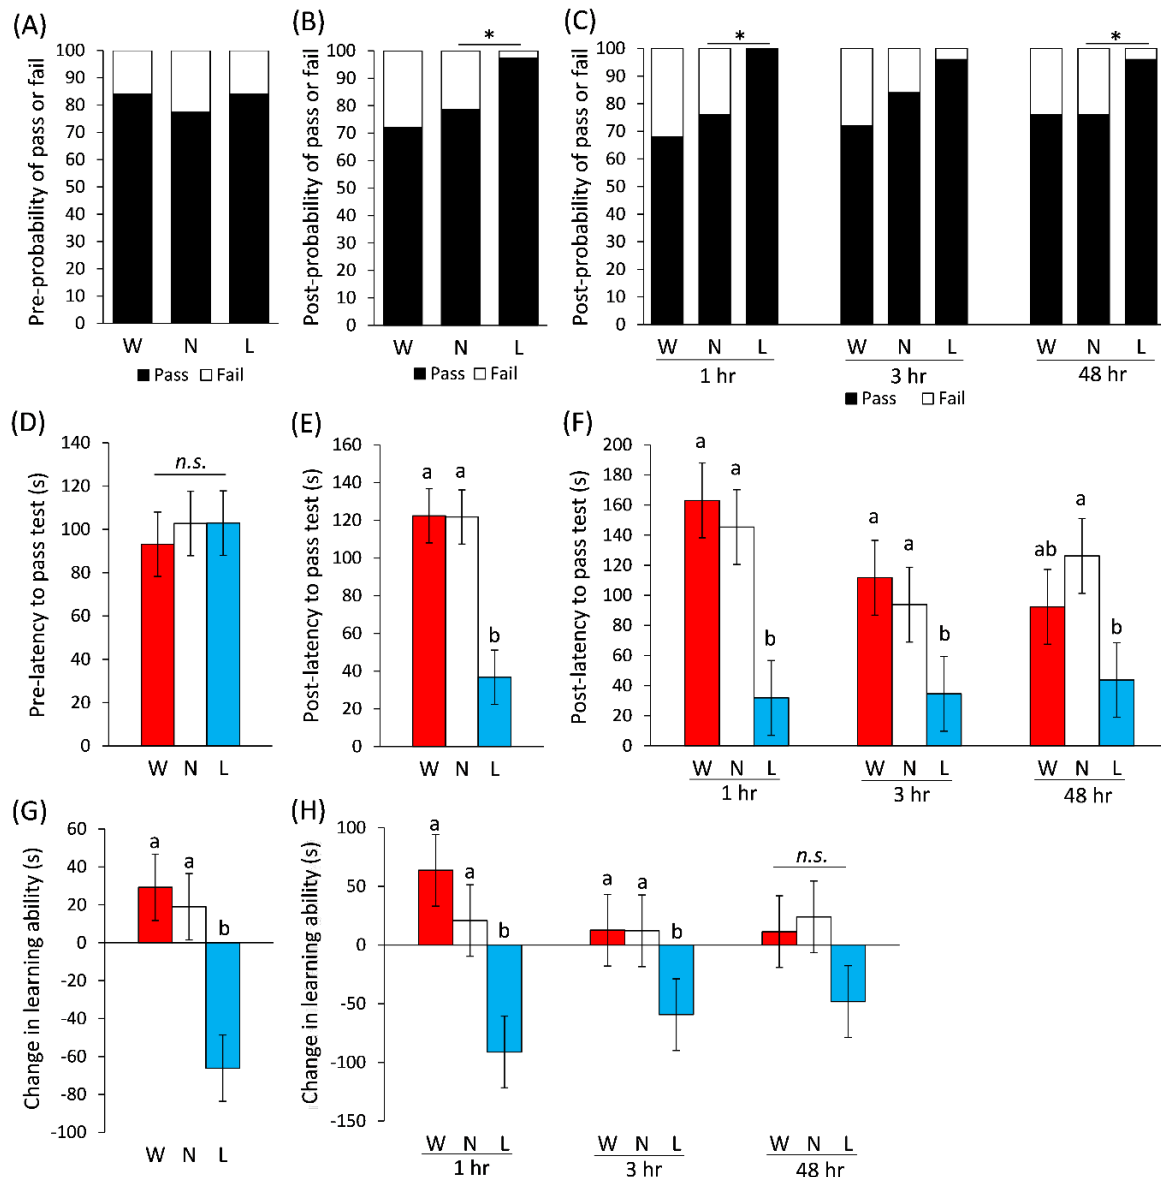

552 **Figure 4.** The influence of social experience on risk-avoidance learning. Differences among  
 553 the treatments prior to social experience for (A) probability of passing/failing the learning test  
 554 and (D) latency (in seconds, *s*) to complete the learning test. Effects of social experience on  
 555 risk-avoidance learning, including (B) probability of passing/failing the test, (E) latency to  
 556 complete the learning test, and (G) change in learning ability (post-experience minus pre-  
 557 experience performance). Temporal changes in experience effects on spatial learning  
 558 behavior from 1h, 3h to 48h, including (C) probability of passing/failing the tests, (F) latency  
 559 to complete the learning test and (H) change in learning ability. Note that ‘latency to pass  
 560 learning test’ is inversely correlated with learning ability such that negative changes in  
 561 latency indicate increased learning performance. Asterisk indicates significant difference  
 562 between treatments (Chi-square test). Different lowercase letters indicate significant  
 563 differences between treatments within a histogram plot (Tukey’s HSD,  $P < 0.05$ ; n.s. non-  
 564 significant; W-winners, N-control (no) experience, L-losers;  $n = 75$  for each experience).

565

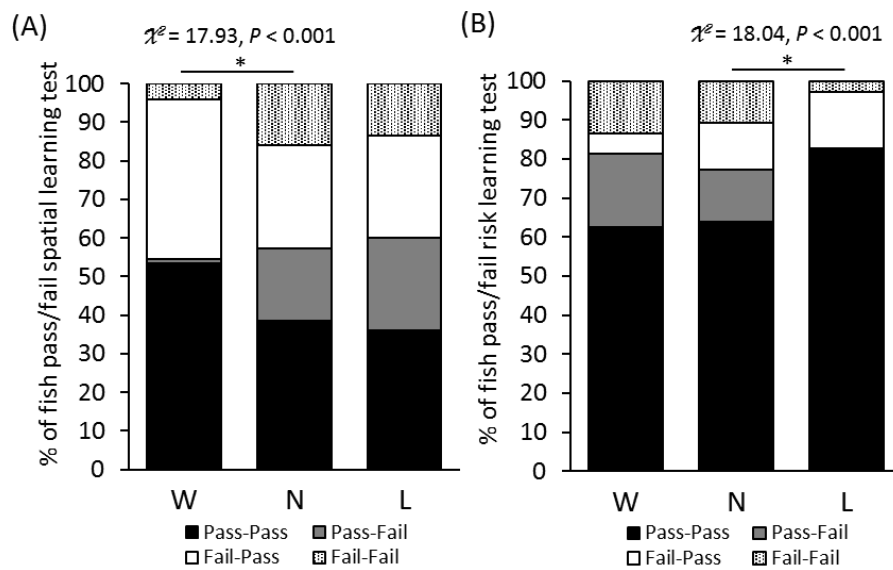

566

567 **Figure 5.** Comparison of probabilities for consecutive pass-fail sequences among the three  
568 treatment groups in (A) spatial learning ability and (B) risk-avoidance learning ability. (Pass-  
569 Pass: individuals passed both pre- and post-experience learning tests; Pass-Fail: individuals  
570 passed pre-experience learning test but failed post-experience learning test; Fail-Pass:  
571 individuals failed pre-experience learning test but passed post-experience learning test; Fail-  
572 Fail: individuals failed both pre- and post-experience learning tests; W-winners, N-control  
573 (no) experience, L-losers;  $n = 75$  for each experience). Asterisk indicates significant  
574 difference between treatments (Chi-square test).

575

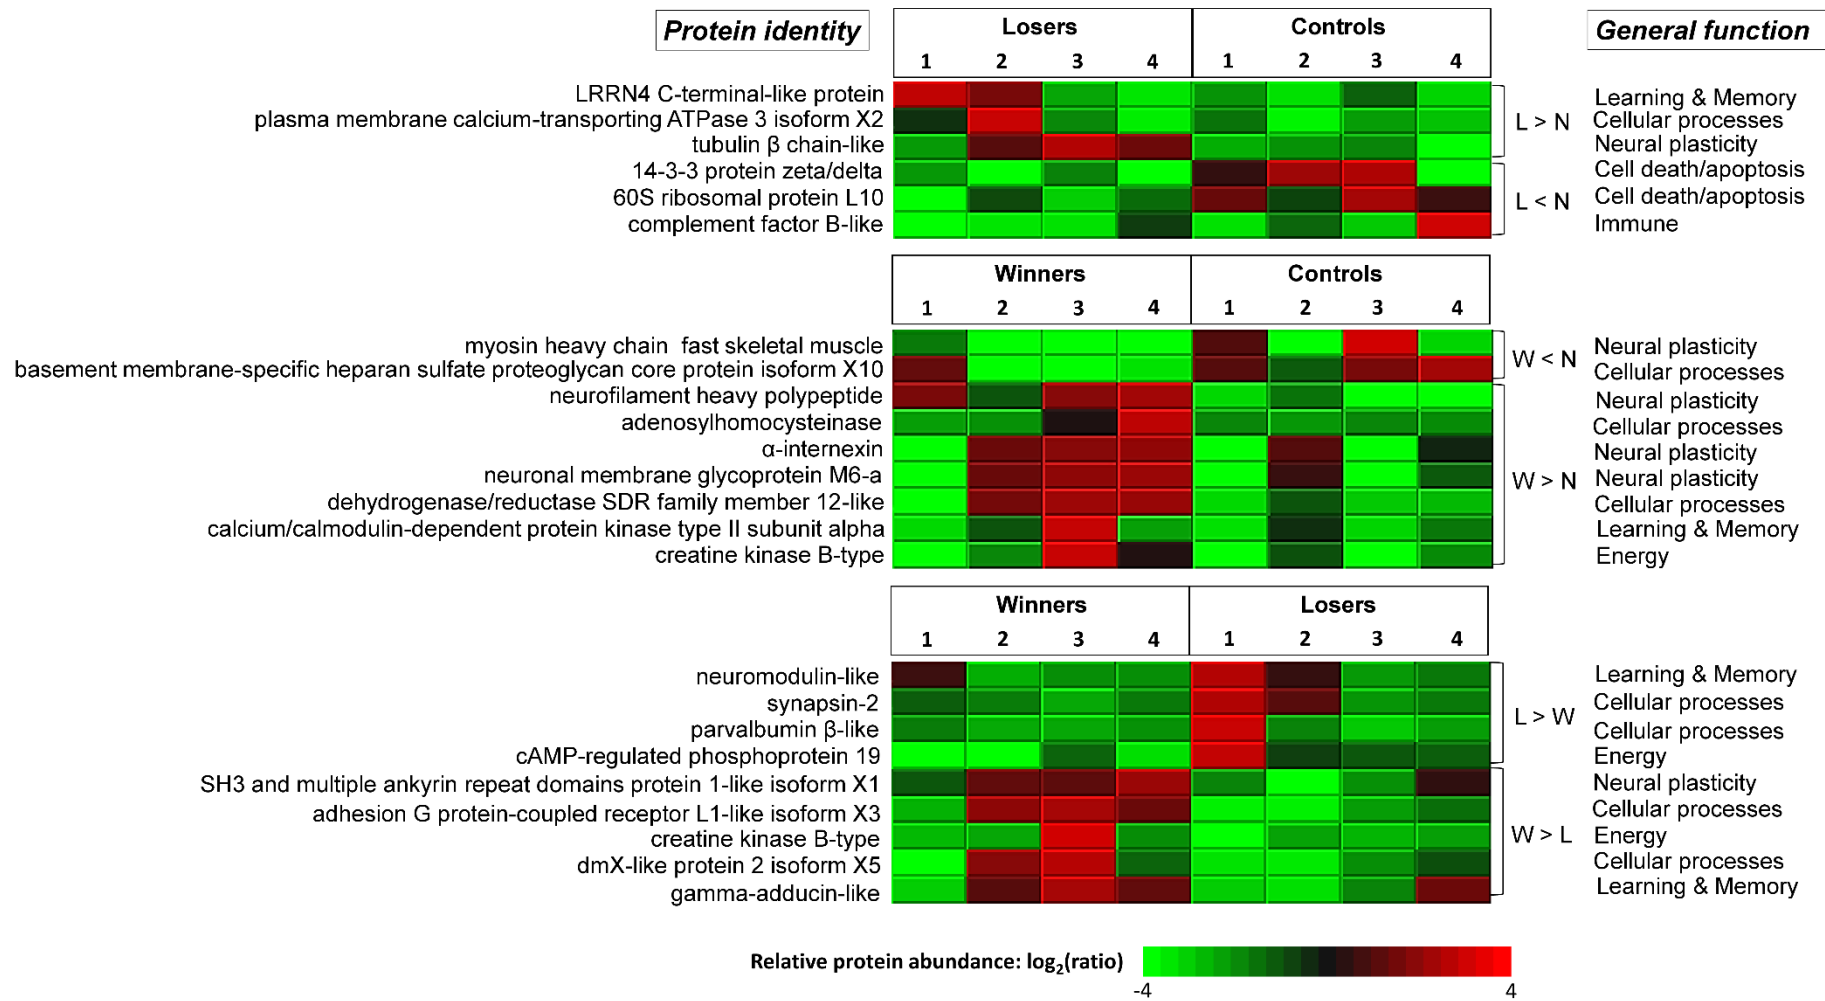

576 **Figure 6.** Relative abundances of forebrain proteins that were significantly up- or down-regulated after social experience. Each column  
 577 represents a single individual (winner  $n = 4$ , loser  $n = 4$ , control  $n = 4$ ) and each row represents a unique protein. Red rectangles represent  
 578 proteins that showed increased expression after social experience and green rectangles represent proteins that showed decreased expression after  
 579 social experience. Note that the heat map color is based on a  $\log_2$  scale. (W-winners, N-control (no) experience, L-losers).
